# Supplementary figures and images for: Screening of Sepsis Biomarkers Based on Bioinformatics Data Analysis
Source: Hindawi journal article supplement (doi:10.1155/2022/6788569), 2022-09-26

wilcox.tests p=3.3e-65

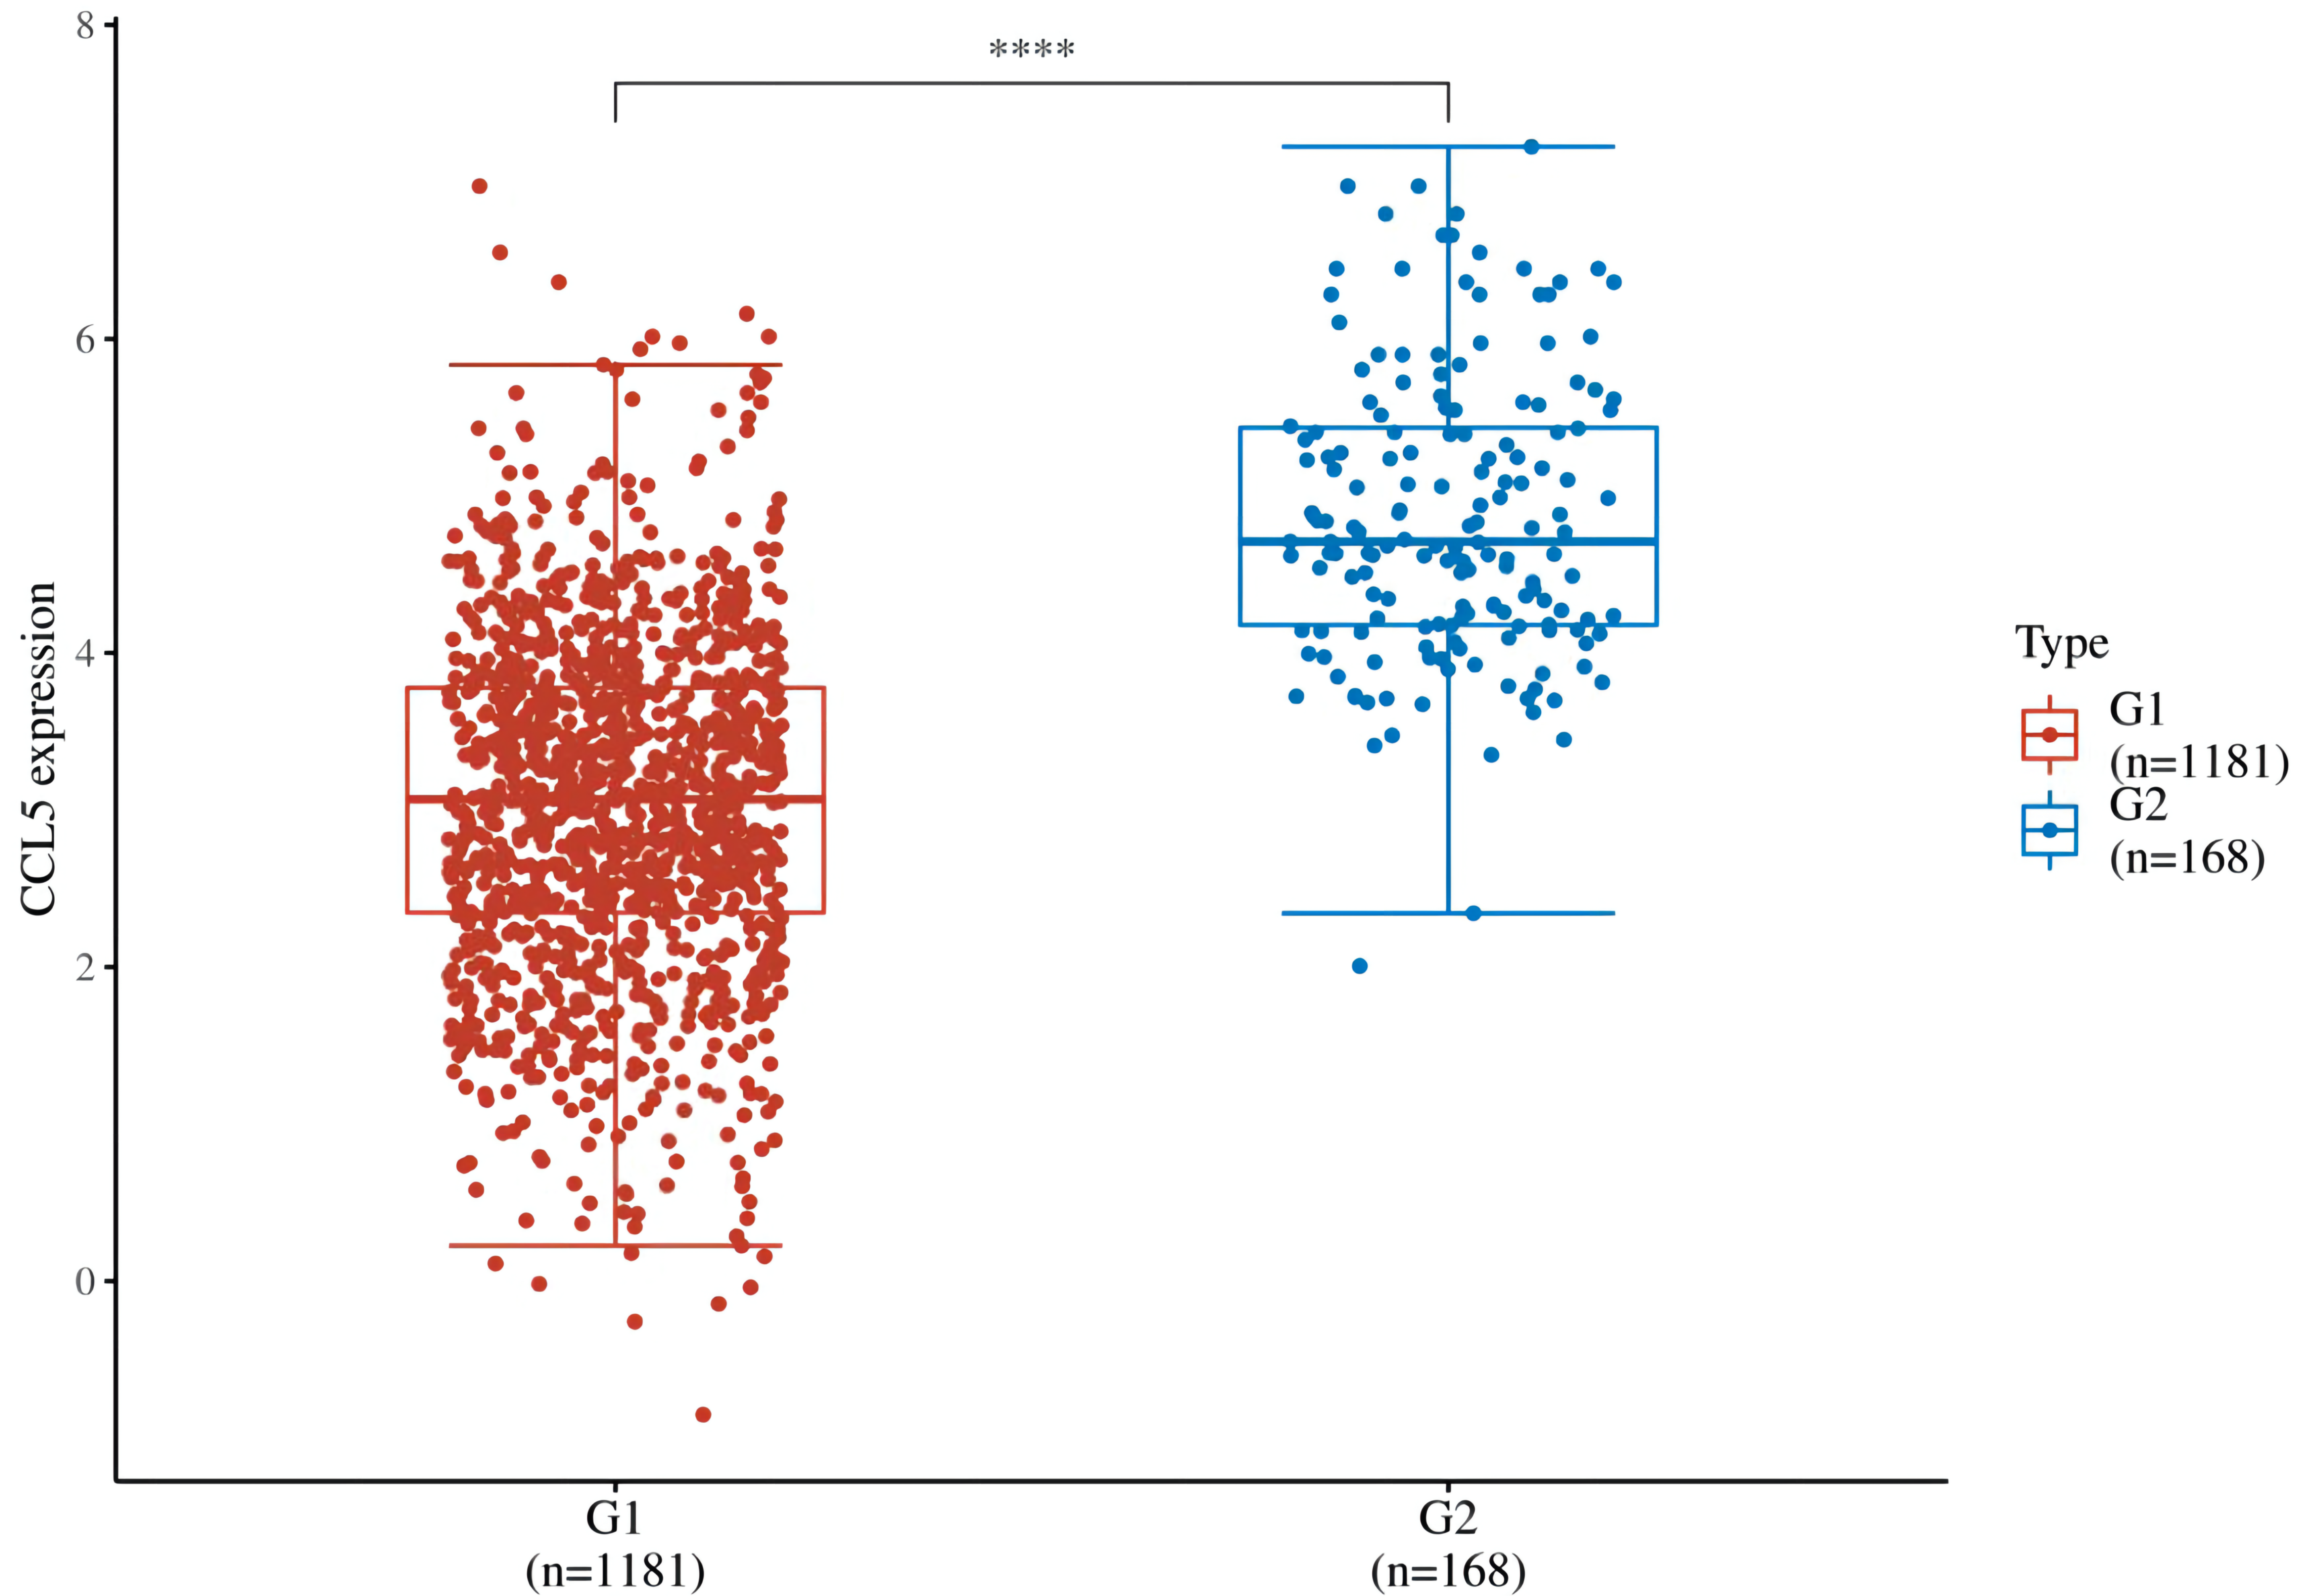

Supplement: f1 [file 6788569.f1.zip]

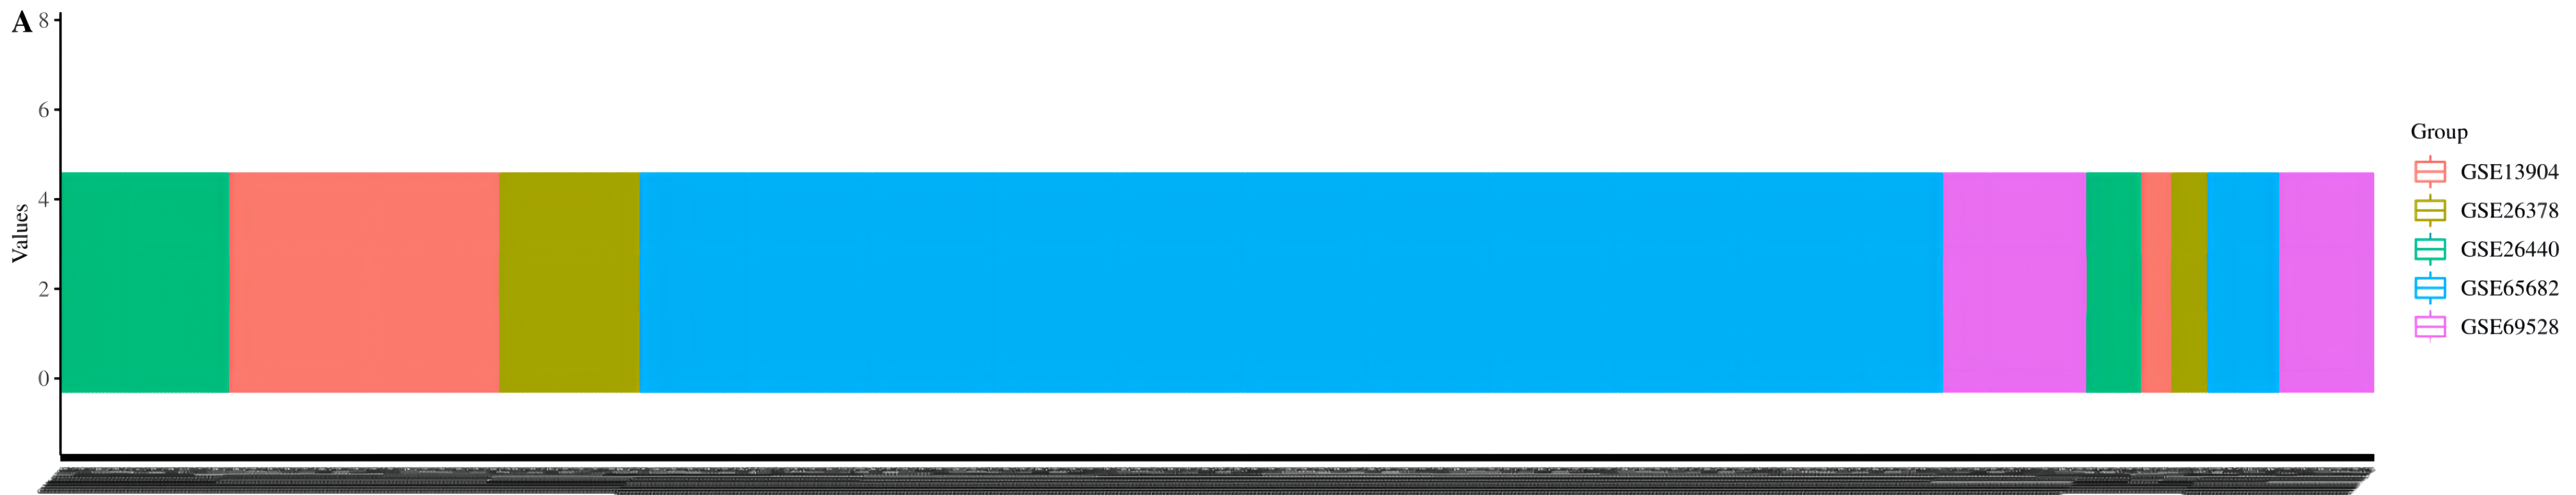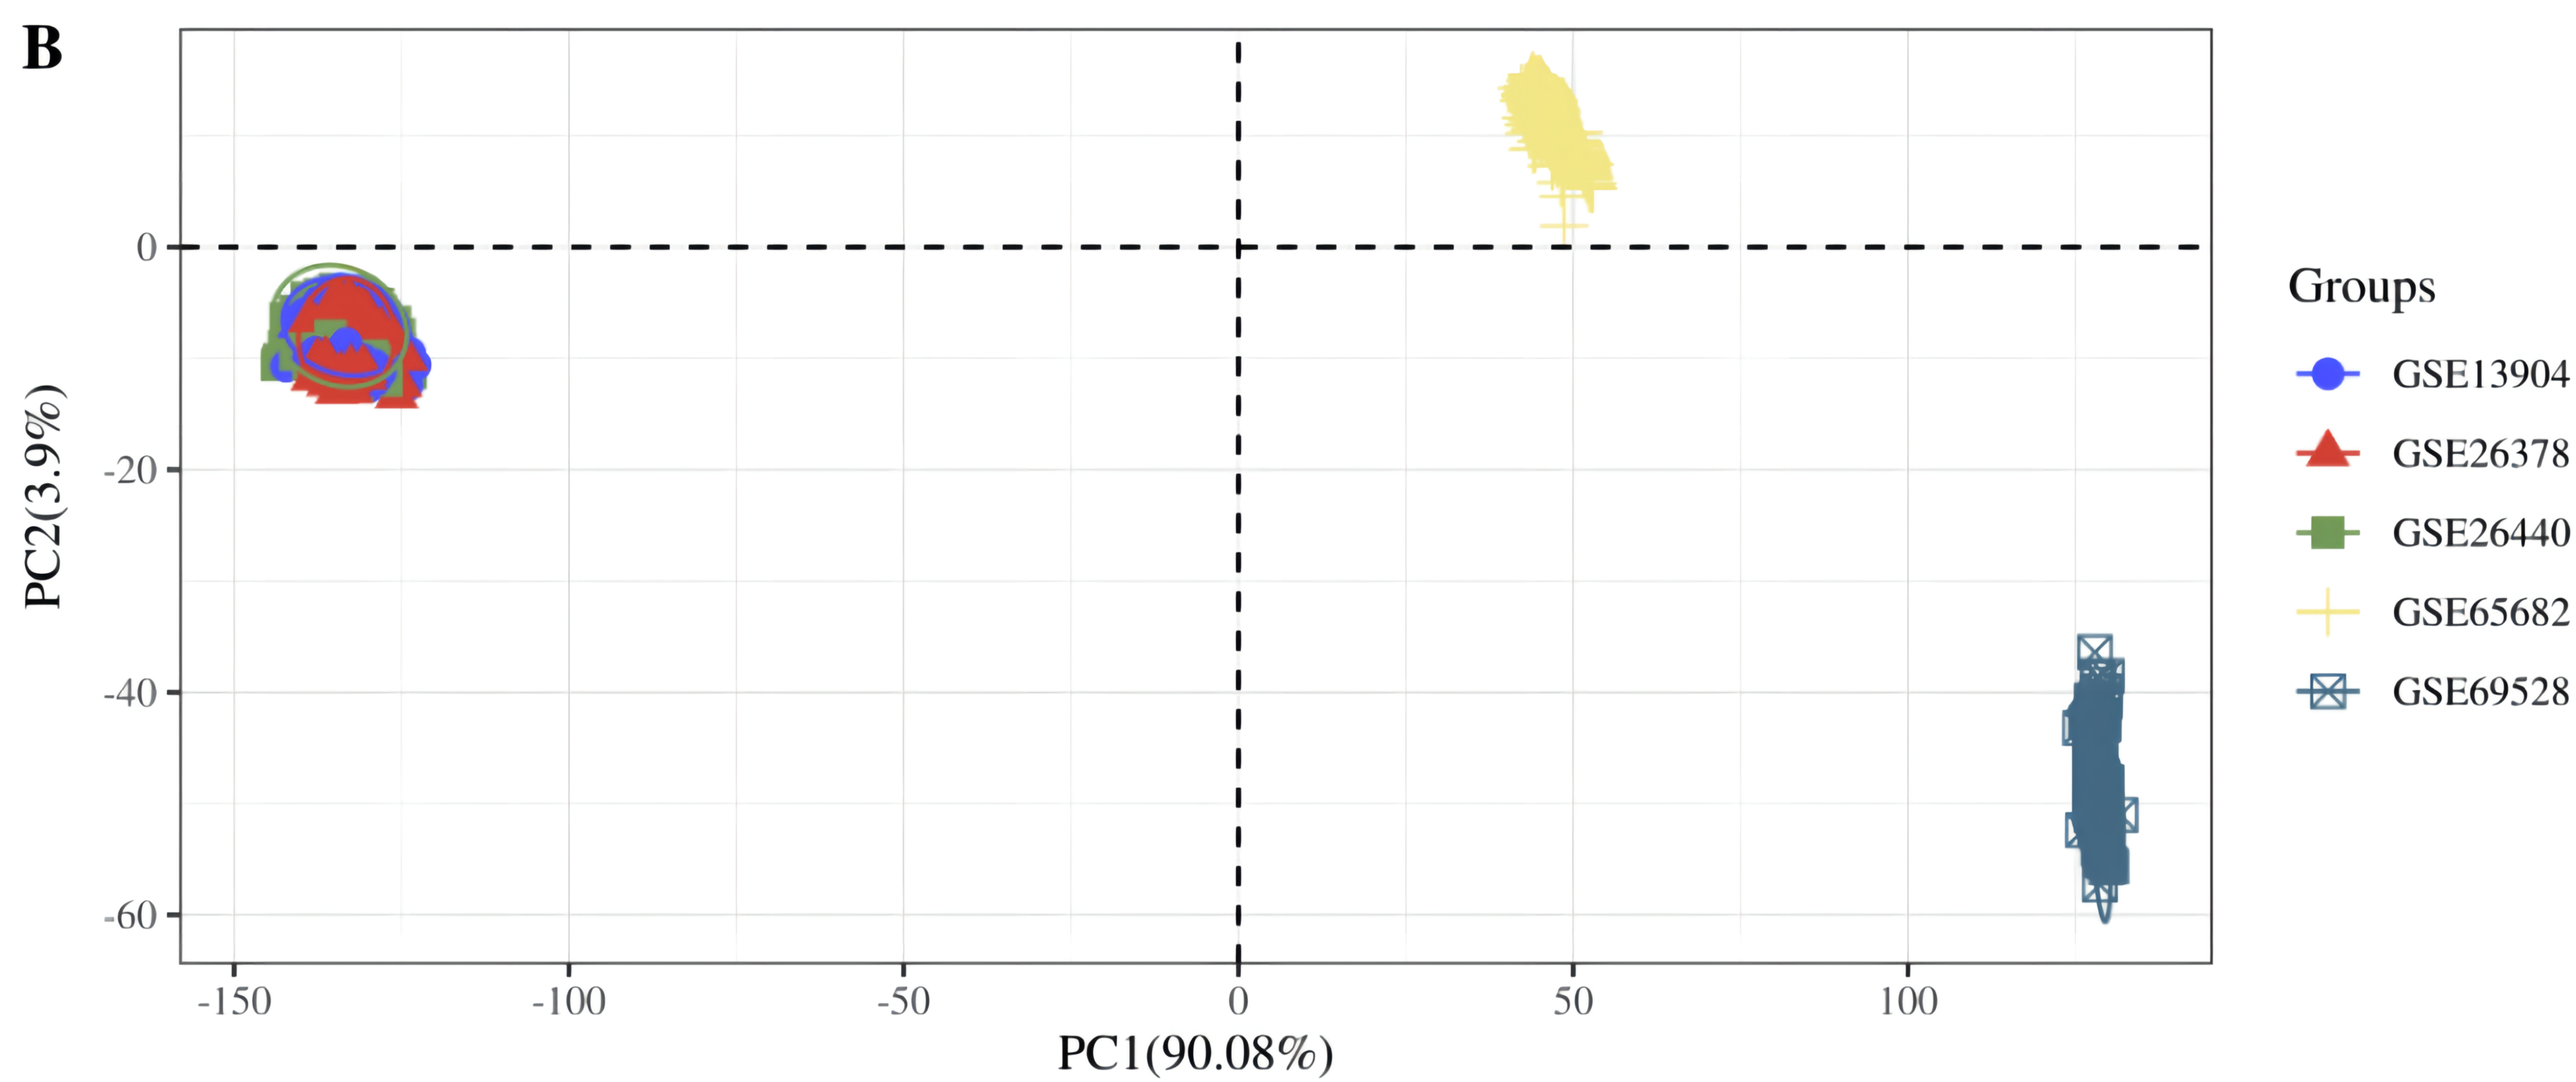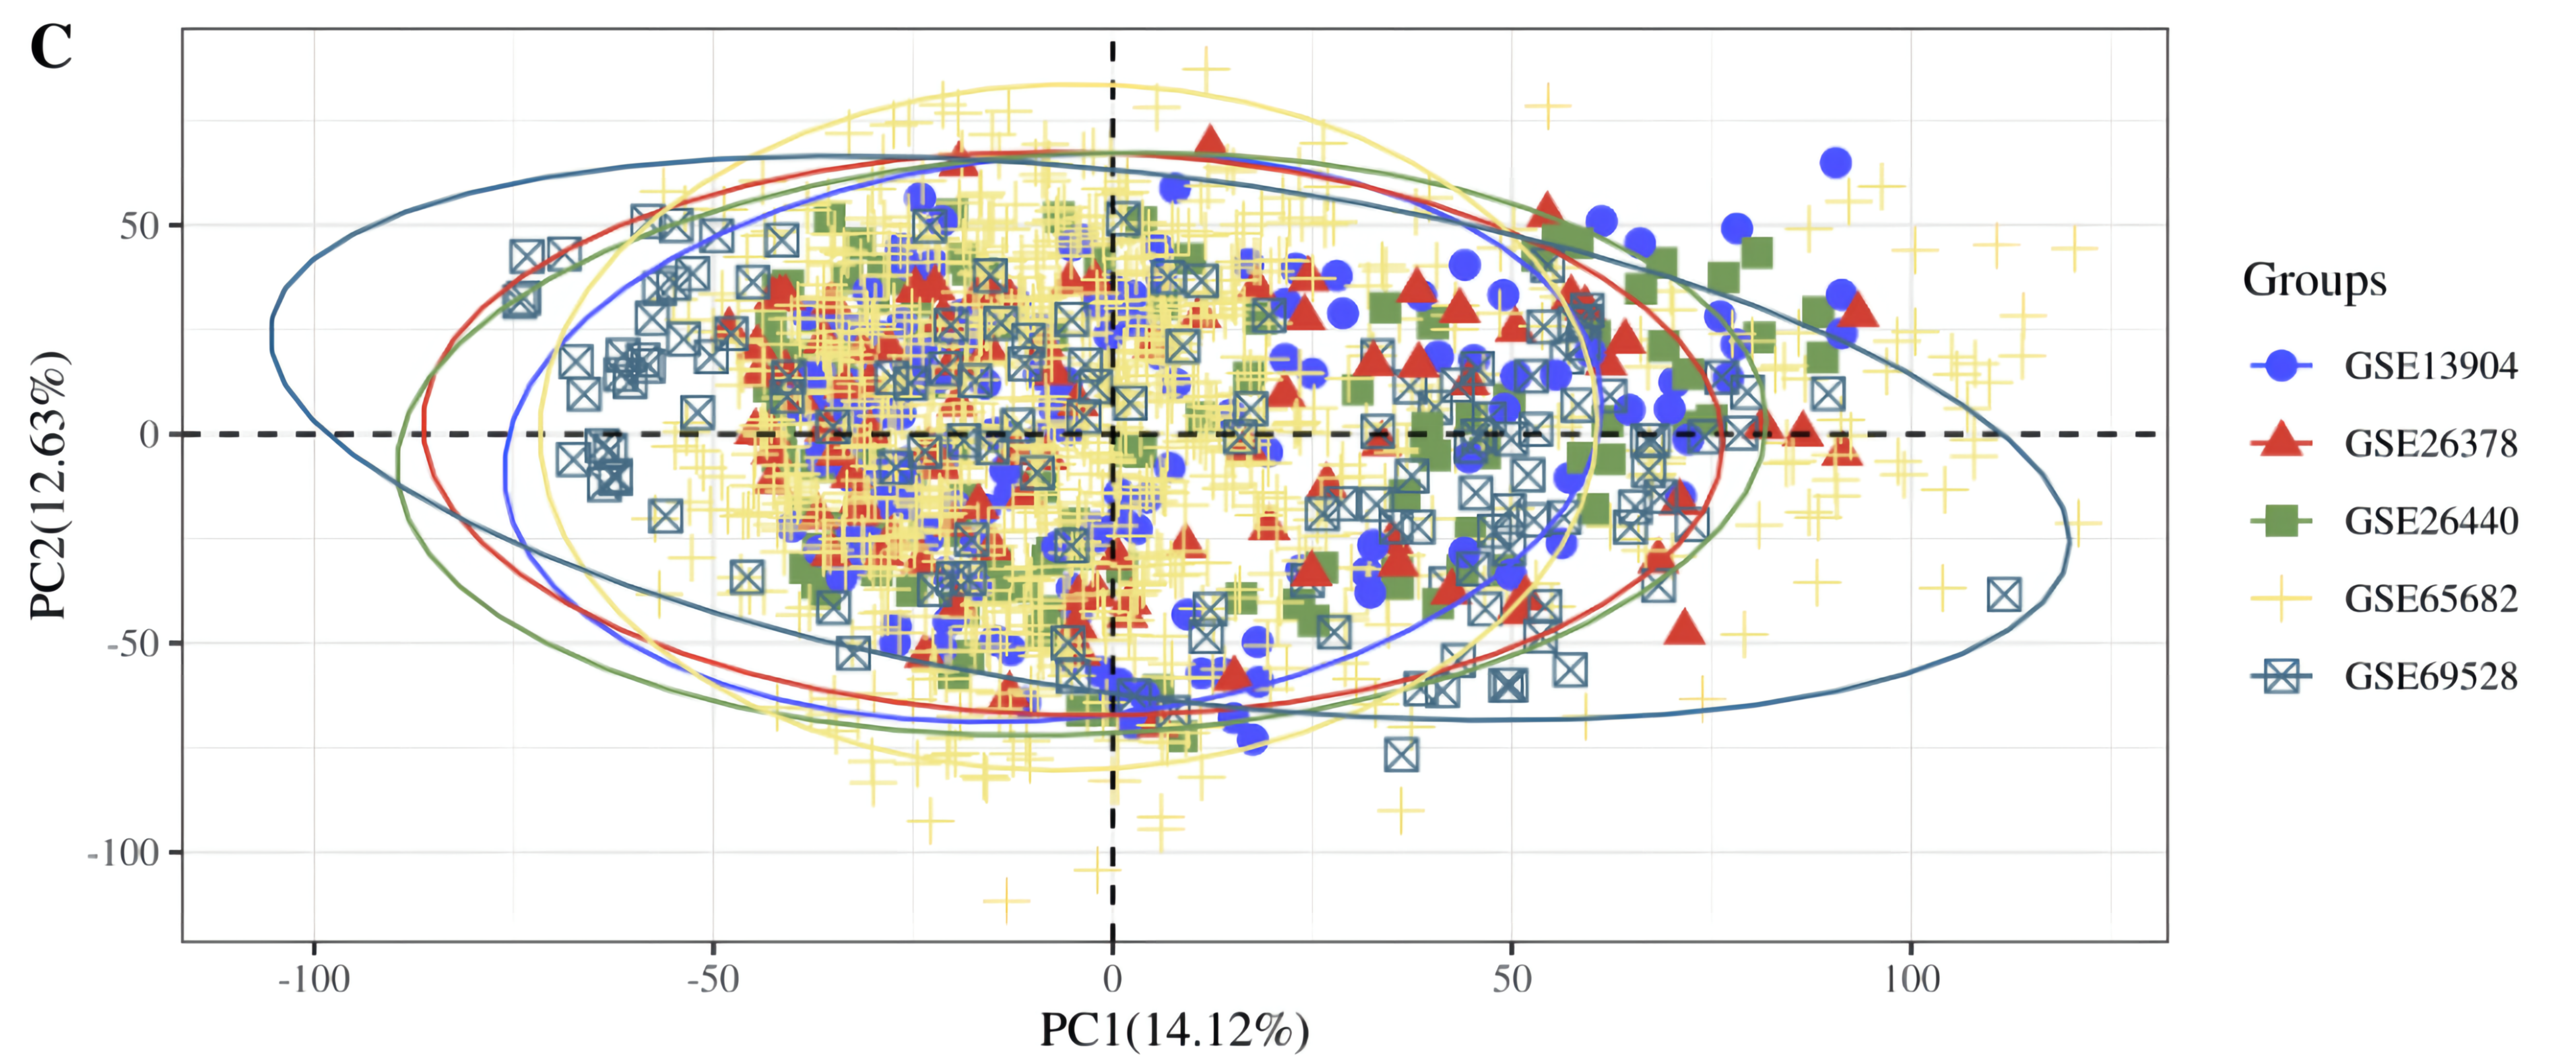

Supplement: f1 [file 6788569.f1.zip]
